# Supplementary material
Source: publisher site journal article supplement (https://www.dovepress.com/article/356947)
Supplement: Supplementary file 1 [file get_supplementary_file.php]

**Supplement Table 1.** Odds ratios and 95% confidence intervals for high hs-CRP according to relative hand grip strength quartiles based on menopausal age.

|  | Relative handgrip strength (kg/BMI) quartile | | | |
| --- | --- | --- | --- | --- |
|  | Q1 | Q2 | Q3 | Q4 |
| **Menopause age** |  |  |  |  |
| <50 yrs | 3.286 (1.799-6.003) | 1.869 (1.054-3.315) | 1.421 (0.815-2.478) | 1 |
| 50 yrs ≤ | 3.193 (1.918-5.316) | 2.191 (1.353-3.551) | 2.116 (1.329-3.369) | 1 |

**Supplement Table 2.** Odds ratios and 95% confidence intervals for high hs-CRP according to relative hand grip strength quartiles based on BMI group.

|  | Relative handgrip strength (kg/BMI) quartile | | | |
| --- | --- | --- | --- | --- |
|  | Q1 | Q2 | Q3 | Q4 |
| **BMI** |  |  |  |  |
| Normal | 1.756 (0.935-3.298) | 1.630 (0.883-3.008) | 1.390 (0.746-2.591) | 1 |
| Overweight | 2.264 (1.064-4.816) | 1.240 (0.624-2.461) | 1.467 (0.624-2.461) | 1 |
| Obese | 1.913 (1.045-3.503) | 2.132 (1.233-3.685) | 1.405 (0.786-2.511) | 1 |
